# Supplementary material
Source: PubMed Central journal article supplement (PMC4524080)
Supplement: JVI.01232-15_zjv999090727so1.pdf [file JVI.01232-15_zjv999090727so1.pdf]

## Supplementary information for

### **Co-crystal structures of antibody N60-i3 and antibody JR4 in complex with gp120 define more Cluster A epitopes involved in effective antibody-dependent effector function against HIV-1**

Neelakshi Gohain<sup>1,2\*</sup>; William D. Tolbert<sup>1,2\*</sup>, Priyamvada Acharya<sup>3</sup>, Lei Yu<sup>1,4</sup>, Tongyun Liu<sup>1,4</sup>, Pingsen Zhao<sup>1,4</sup>, Chiara Orlandi<sup>1,4</sup>, Maria L. Visciano<sup>1,4</sup>, Roberta Kamin-Lewis<sup>1,4</sup>; Mohammad M. Sajadi<sup>1,5,6</sup>; Loïc Martin<sup>7</sup>; James E. Robinson<sup>8</sup>, Peter D. Kwong<sup>3</sup>; Anthony L. DeVico<sup>1,5</sup>, Yongjun Guan<sup>1,4</sup>; Krishanu Ray<sup>2</sup>, George K. Lewis<sup>1,4</sup>; Marzena Pazgier<sup>1,2</sup>.

<sup>1</sup>Institute of Human Virology and Departments of <sup>2</sup>Biochemistry and Molecular Biology of University of Maryland School of Medicine, Baltimore, MD 21201, USA

<sup>3</sup>Vaccine Research Center, National Institute of Allergy and Infectious Diseases, National Institutes of Health, Bethesda, MD 20892, USA

<sup>4</sup>Department of Microbiology and Immunology and <sup>5</sup>Medicine of University of Maryland School of Medicine, Baltimore, MD 21201, USA

<sup>6</sup>Medical Care Clinical Center, VA Maryland Health Care Center, Baltimore, MD 21201, USA

<sup>7</sup>CEA, iBiTecS, Service d'Ingénierie Moléculaire des Protéines, F-91191 Gif-sur-Yvette, France

<sup>8</sup>Department of Pediatrics, Tulane University Medical Center, New Orleans, LA 70112, USA

\* These authors contributed equally to this work

#To whom correspondence should be addressed:

Email: mpazgier@ihv.umaryland.edu

725 West Lombard Street, Baltimore, MD 21201, USA

Tel: (410)706-4780

Fax: (410)706-7583

Table S1. Details of the N60-i3- and JR4-gp120<sub>93TH057</sub> core<sub>e</sub> interfaces as calculated by the EBI PISA server ([http://www.ebi.ac.uk/msd-srv/prot\\_int/cgi-bin/piserver](http://www.ebi.ac.uk/msd-srv/prot_int/cgi-bin/piserver))

|                                                 |                                                           | N60-i3 Fab-gp120 <sub>93TH057</sub> core <sub>e</sub> -M48U1 |                |                              | JR4 Fab- gp120 <sub>93TH057</sub> core <sub>e</sub> -M48 |                    |                              |         |
|-------------------------------------------------|-----------------------------------------------------------|--------------------------------------------------------------|----------------|------------------------------|----------------------------------------------------------|--------------------|------------------------------|---------|
|                                                 |                                                           | Heavy chain                                                  |                | Light chain                  | Heavy chain                                              |                    | Light chain                  |         |
| <b>Buried Surface Area (BSA), Å<sup>2</sup></b> | <b>gp120<sub>93TH057</sub> core<sub>e</sub> total</b>     | <b>695</b>                                                   |                |                              | <b>1145 (1148)*</b>                                      |                    |                              |         |
|                                                 | <b>7-stranded β-sandwich</b>                              | 2                                                            |                | 0                            | 121 (131)                                                |                    | 0 (0)                        |         |
|                                                 | <b>Layer 1</b>                                            | 439                                                          |                | 107                          | 656 (655)                                                |                    | 185 (198)                    |         |
|                                                 | <b>Layer 2</b>                                            | 144                                                          |                | 3                            | 183 (164)                                                |                    | 0 (0)                        |         |
|                                                 |                                                           | <b>Layer 1</b>                                               | <b>Layer 2</b> | <b>7-stranded β-sandwich</b> | <b>Layer 1</b>                                           | <b>Layer 2</b>     | <b>7-stranded β-sandwich</b> |         |
|                                                 |                                                           | <b>Heavy chain total</b>                                     |                |                              | <b>988 (989)</b>                                         |                    |                              |         |
|                                                 |                                                           | FWR                                                          | 4              | 12                           | 1                                                        | 192 (185)          | 14 (8)                       | 0 (0)   |
|                                                 |                                                           | CDR H1                                                       | 52             | 57                           | 0                                                        | 142 (144)          | 79 (65)                      | 0 (1)   |
|                                                 |                                                           | CDR H2                                                       | 154            | 0                            | 0                                                        | 63 (57)            | 48 (60)                      | 21 (39) |
|                                                 |                                                           | CDR H3                                                       | 235            | 142                          | 0                                                        | 267 (279)          | 70 (61)                      | 92 (90) |
|                                                 |                                                           | <b>Light chain total</b>                                     |                |                              | <b>208 (213)</b>                                         |                    |                              |         |
|                                                 |                                                           | FWR                                                          | 0              | 0                            | 0                                                        | 31 (35)            | 0 (0)                        | 0 (0)   |
|                                                 |                                                           | CDR L1                                                       | 71             | 4                            | 0                                                        | 59 (49)            | 0 (0)                        | 0 (0)   |
|                                                 |                                                           | CDR L2                                                       | 0              | 0                            | 0                                                        | 118 (129)          | 0 (0)                        | 0 (0)   |
|                                                 |                                                           | CDR L3                                                       | 39             | 0                            | 0                                                        | 0 (0)              | 0 (0)                        | 0 (0)   |
|                                                 |                                                           | <b>Heavy and light chain total</b>                           | <b>771</b>     |                              |                                                          | <b>1196 (1202)</b> |                              |         |
|                                                 | <b>Fab-gp120<sub>93TH057</sub> core<sub>e</sub> total</b> | <b>1466</b>                                                  |                |                              | <b>2341 (2350)</b>                                       |                    |                              |         |

\* number in the brackets show BSA as calculated for second copy of JR4 Fab-gp120<sub>93TH057</sub> core<sub>e</sub>-M48 complex in the asymmetric unit

**Table S2. Interactions at the N60-i3-gp120<sup>93TH057</sup> and JR4-gp120 core<sub>e</sub> interfaces.** Accessible Surface Area, Å<sup>2</sup> (ASA) and Buried Surface Area, Å<sup>2</sup> (BSA) were calculated using the EBI PISA server ([http://www.ebi.ac.uk/msd-srv/prot\\_int/cgi-bin/piserver](http://www.ebi.ac.uk/msd-srv/prot_int/cgi-bin/piserver)) Vertical bars 'I' represent the buried area percentage, one bar per 10%.

**N60-i3 Fab-gp120  
93TH057 core<sub>e</sub>-M48U1**

|       |            | Heavy chain | ASA    | BSA |
|-------|------------|-------------|--------|-----|
| CDRH1 | H: ILE 29  | 72.85       | 0.34   |     |
|       | H:SER 30   | 66.54       | 16.09  |     |
|       | H:SER 31   | 57.48       | 40.16  |     |
|       | H:GLY 32   | 21.24       | 18.92  |     |
|       | H:GLY 33   | 24.18       | 24.18  |     |
|       | H:TYR 34   | 36.53       | 10.69  |     |
|       | H:PHE 35   | 20.18       | 15.32  |     |
|       | H:TYR 52   | 43.42       | 40.61  |     |
|       | H:TYR 53   | 68.62       | 36.74  |     |
|       | H:ILE 54   | 98.99       | 52.24  |     |
| CDRH2 | H:ASN 56   | 64.79       | 17.84  |     |
|       | H:TYR 58   | 88.33       | 6.31   |     |
|       | H:ARG 97   | 113.20      | 76.08  |     |
|       | H:LEU 98   | 120.56      | 84.50  |     |
| CDRH3 | H:ARG 99   | 239.92      | 194.91 |     |
|       | H:GLY 100  | 37.93       | 15.68  |     |
|       | H:ASN 100B | 79.51       | 5.97   |     |
|       |            |             |        |     |

|                 |           | gp120  | ASA   | BSA |
|-----------------|-----------|--------|-------|-----|
| Layer1          | G:THR 51  | 112.44 | 47.77 |     |
|                 | G:LEU 52  | 16.68  | 16.01 |     |
|                 | G:PHE 53  | 80.16  | 70.31 |     |
|                 | G:CYS 54  | 7.28   | 7.28  |     |
|                 | G:TRP 69  | 17.88  | 1.88  |     |
|                 | G:THR 71  | 77.17  | 9.56  |     |
|                 | G:HIS 72  | 101.61 | 21.96 |     |
|                 | G:ALA 73  | 60.28  | 50.80 |     |
|                 | G:CYS 74  | 12.93  | 10.32 |     |
|                 | G:VAL 75  | 65.92  | 61.92 |     |
|                 | G:PRO 76  | 118.17 | 84.65 |     |
|                 | G:THR 77  | 41.33  | 7.37  |     |
|                 | G:ASP 78  | 72.18  | 20.65 |     |
|                 | G:PRO 79  | 127.06 | 28.45 |     |
| Layer2          | G:GLN 103 | 27.08  | 17.37 |     |
|                 | G:GLU 106 | 116.19 | 12.91 |     |
|                 | G:ASP 107 | 32.53  | 25.32 |     |
|                 | G:TYR 217 | 8.67   | 4.62  |     |
|                 | G:THR 219 | 10.55  | 5.89  |     |
|                 | G:PRO 220 | 45.37  | 34.28 |     |
| G:ALA 221       | 92.55     | 43.36  |       |     |
| 7-strand β sand | G:GLN 246 | 74.22  | 1.65  |     |

|       |          | Light chain | ASA   | BSA |
|-------|----------|-------------|-------|-----|
| CDRL1 | L:TYR 30 | 67.79       | 28.38 |     |
|       | L:TYR 32 | 109.06      | 45.08 |     |
| CDRL2 | L:TYR 91 | 48.76       | 31.87 |     |
|       | L:SER 94 | 101.18      | 0.17  |     |
|       | L:SER 95 | 73.32       | 7.03  |     |

|        |           | gp120  | ASA   | BSA |
|--------|-----------|--------|-------|-----|
| Layer1 | G:ALA 60  | 86.29  | 0.25  |     |
|        | G:VAL 68  | 73.11  | 3.00  |     |
|        | G:THR 71  | 77.00  | 16.99 |     |
|        | G:HIS 72  | 101.12 | 76.33 |     |
| Layer2 | G:ALA 73  | 60.86  | 9.53  |     |
|        | G:GLN 114 | 88.17  | 1.94  |     |

**JR4 Fab- gp120<sup>93TH057</sup> core<sub>e</sub>-M48**

|       |            | Heavy chain | ASA    | BSA |
|-------|------------|-------------|--------|-----|
| CDRH1 | H:ARG 31   | 185.40      | 152.7  |     |
|       | H:ASN 32   | 26.39       | 24.86  |     |
|       | H:TYR 33   | 46.11       | 42.88  |     |
| CDRH2 | H:TYR 52   | 68.42       | 68.27  |     |
|       | H:SER 53   | 57.35       | 19.07  |     |
|       | H:GLY 54   | 54.64       | 13.87  |     |
|       | H:SER 56   | 56.20       | 25.88  |     |
| CDRH3 | H:ASN 58   | 69.48       | 4.74   |     |
|       | H:THR 95   | 5.11        | 3.47   |     |
|       | H:VAL 96   | 26.82       | 26.15  |     |
|       | H:TRP 97   | 66.80       | 21.06  |     |
|       | H:TYR 98   | 139.03      | 138.71 |     |
|       | H:TYR 99   | 179.31      | 71.83  |     |
|       | H:THR 100  | 127.12      | 60.00  |     |
|       | H:SER 100A | 91.14       | 49.26  |     |
|       | H:THR 100C | 55.48       | 19.08  |     |
|       | H:TYR 100E | 108.14      | 28.72  |     |
|       | H:ASP 101  | 56.06       | 9.56   |     |
|       | H:HIS 102  | 42.22       | 0.87   |     |

|                       |           | gp120     | ASA    | BSA   |  |
|-----------------------|-----------|-----------|--------|-------|--|
| Layer1                | G:THR 50  | 28.65     | 8.94   |       |  |
|                       | G:THR 51  | 114.20    | 99.83  |       |  |
|                       | G:LEU 52  | 15.37     | 15.04  |       |  |
|                       | G:PHE 53  | 85.93     | 82.21  |       |  |
|                       | G:CYS 54  | 10.95     | 10.65  |       |  |
|                       | G:ALA 55  | 3.18      | 2.68   |       |  |
|                       | G:ALA 60  | 94.50     | 10.09  |       |  |
|                       | G:VAL 68  | 51.91     | 0.83   |       |  |
|                       | G:TRP 69  | 19.39     | 5.79   |       |  |
|                       | G:THR 71  | 41.66     | 21.07  |       |  |
|                       | G:HIS 72  | 162.55    | 93.56  |       |  |
|                       | G:ALA 73  | 57.95     | 49.24  |       |  |
|                       | G:CYS 74  | 13.33     | 8.87   |       |  |
|                       | G:VAL 75  | 70.22     | 68.83  |       |  |
|                       | G:PRO 76  | 113.36    | 55.19  |       |  |
|                       | G:THR 77  | 37.86     | 5.36   |       |  |
|                       | G:ASP 78  | 48.65     | 30.09  |       |  |
|                       | G:PRO 79  | 132.67    | 32.47  |       |  |
|                       | G:ASN 80  | 95.00     | 14.77  |       |  |
|                       | G:GLN 82  | 112.08    | 41.23  |       |  |
|                       | Layer2    | G:GLN 103 | 28.14  | 1.75  |  |
|                       |           | G:GLU 106 | 120.01 | 12.69 |  |
| G:ASP 107             |           | 33.35     | 21.36  |       |  |
| G:TYR 217             |           | 5.93      | 2.76   |       |  |
| G:PRO 220             |           | 54.67     | 48.86  |       |  |
| G:ALA 221             |           | 107.76    | 86.90  |       |  |
| G:GLY 222             |           | 17.61     | 8.15   |       |  |
| G:I84                 |           | 108.38    | 4.84   |       |  |
| G:TYR 223             |           | 50.09     | 15.62  |       |  |
| G:VAL 224             |           | 32.56     | 5.27   |       |  |
| 7-stranded β sandwich | G:GLN 246 | 101.64    | 80.71  |       |  |
|                       | G:CYS 247 | 18.84     | 5.27   |       |  |
|                       | G:GLU 492 | 153.88    | 9.18   |       |  |

|       |          | Light chain | ASA   | BSA |
|-------|----------|-------------|-------|-----|
| CDRL1 | L:TYR 32 | 137.99      | 58.83 |     |
|       | L:ASP 50 | 57.83       | 28.01 |     |
| CDRL2 | L:LYS 53 | 91.68       | 13.72 |     |
|       | L:SER 56 | 119.44      | 76.04 |     |

|        |          | gp120  | ASA   | BSA |
|--------|----------|--------|-------|-----|
| Layer1 | G:LYS 59 | 136.24 | 14.11 |     |
|        | G:ALA 60 | 94.50  | 19.35 |     |
|        | G:HIS 61 | 121.99 | 12.17 |     |
|        | G:PRO 76 | 113.36 | 33.65 |     |
|        | G:THR 77 | 37.86  | 5.51  |     |
|        | G:PRO 79 | 132.67 | 73.46 |     |
|        | G:ASN 80 | 95.00  | 26.56 |     |
|        |          |        |       |     |

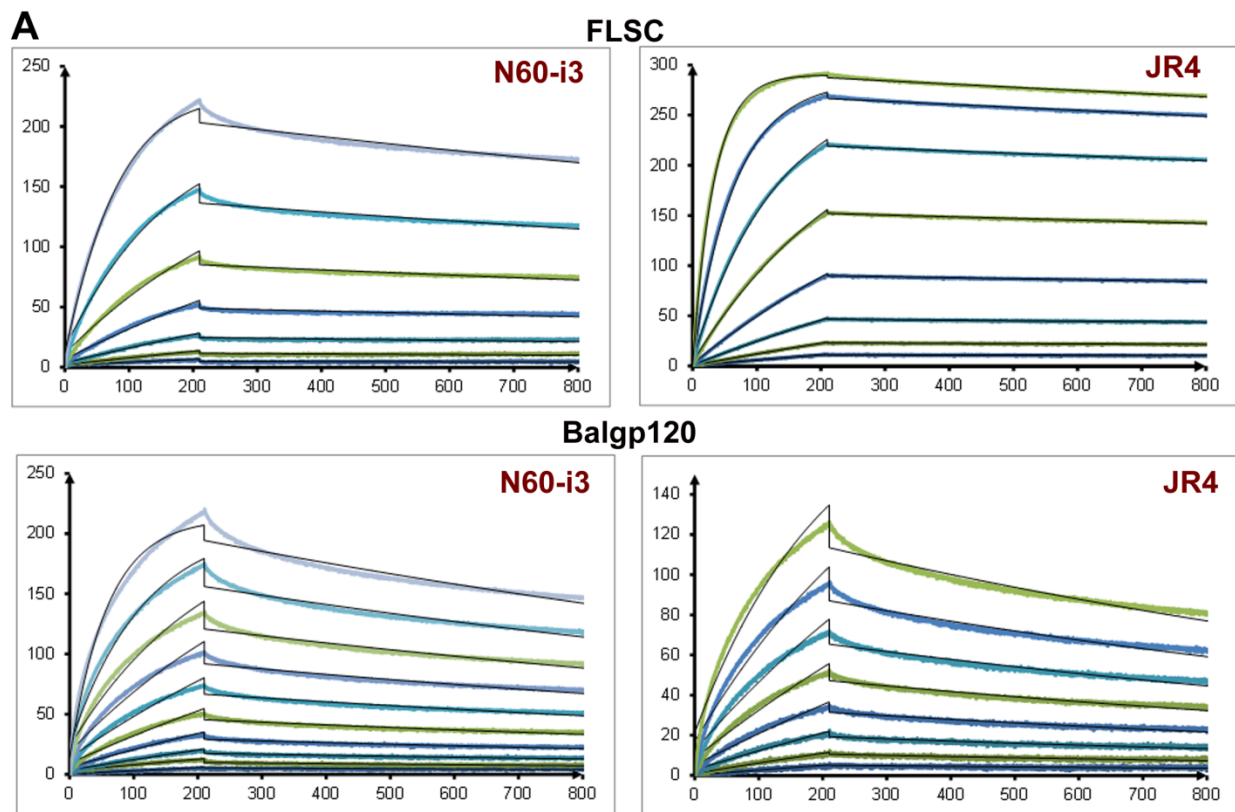

**B**

|                              | FLSC             | gp120           | Fold change |
|------------------------------|------------------|-----------------|-------------|
| <b>mAb N60-i3</b>            |                  |                 |             |
| $K_D$ (M) $\times 10^{-9}$   | $0.3 \pm 0.01$   | $2.0 \pm 0.07$  | <b>6.7</b>  |
| $k_a$ (1/Ms) $\times 10^5$   | $12.4 \pm 0.01$  | $2.5 \pm 0.07$  | <b>5.0</b>  |
| $k_d$ (1/s) $\times 10^{-5}$ | $0.31 \pm 0.01$  | $0.5 \pm 0.05$  | <b>1.6</b>  |
| <b>mAb JR4</b>               |                  |                 |             |
| $K_D$ (M) $\times 10^{-9}$   | $0.2 \pm 0.003$  | $2.3 \pm 0.20$  | <b>11.5</b> |
| $k_a$ (1/Ms) $\times 10^5$   | $6.4 \pm 0.07$   | $2.6 \pm 0.09$  | <b>2.5</b>  |
| $k_d$ (1/s) $\times 10^{-5}$ | $0.12 \pm 0.003$ | $0.61 \pm 0.02$ | <b>5.1</b>  |

**Figure S1. mAb N60-i3 and mAb JR4 binding to monomeric gp120 and a single-chain gp120<sub>BaL</sub>-CD4 complex (FLSC, (1)) as measured by Surface Plasmon Resonance (SPR). (A)** Binding curves of different concentrations of gp120<sub>BaL</sub> and FLSC (0–50 nM, two-fold dilutions) injected over mAb N60-i3 or mAb JR4 captured on Protein A-coated sensor chips. The data were double referenced by subtraction of the blank surface (no antibody) and a blank injection (no analyte). Binding curves were globally fit to a 1:1 binding model. The experiments were repeated with similar results. **(B)** Binding kinetics of mAb N60-i3 and JR4 to monomeric gp120<sub>BaL</sub> and FLSC. Antibody association rates ( $k_{on}$ ), dissociation rates ( $k_{off}$ ), and affinity constants ( $K_D$ ) were calculated with the BIAevaluation software.

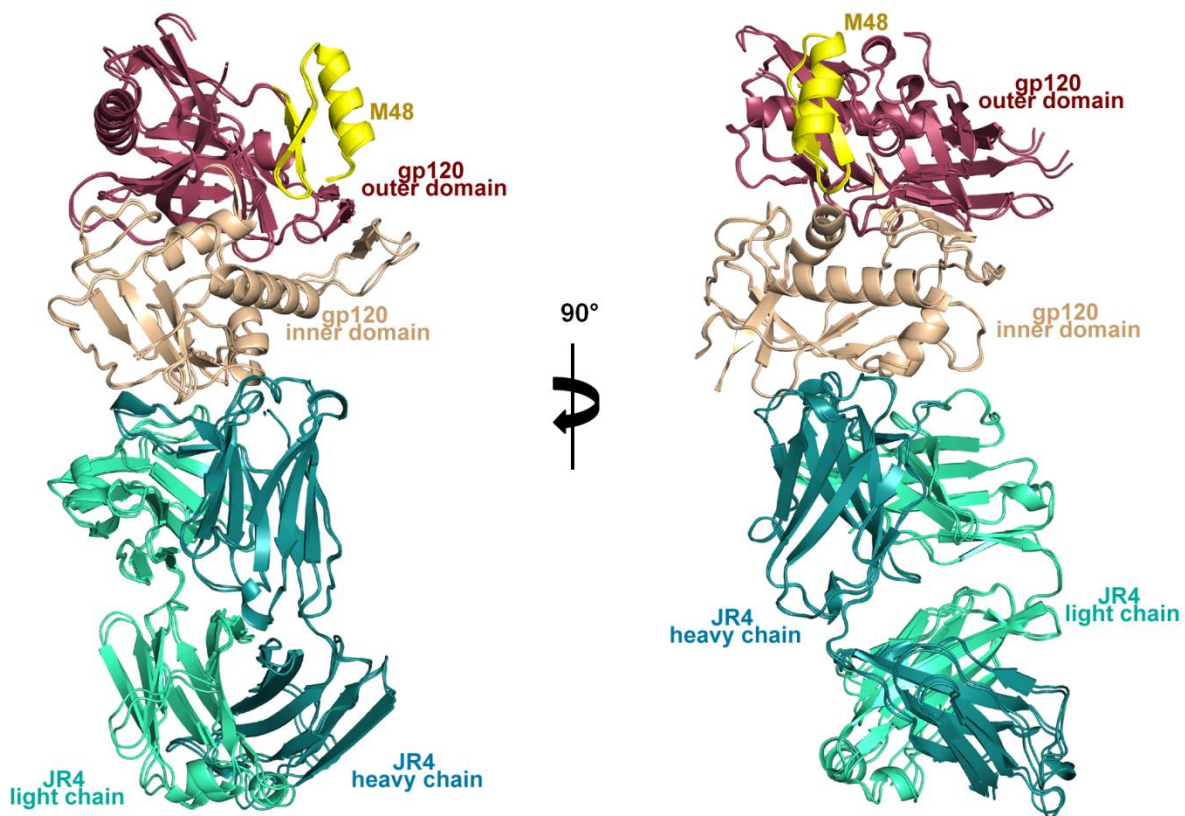

**Figure S2. Ribbon diagram of superposition of the two copies of JR4 Fab-gp120<sub>93TH057</sub> core<sub>6</sub>-M48 complex from the asymmetric unit of the crystal.** The light and heavy chains of JR4 Fab are colored light cyan and dark cyan, respectively. The gp120 inner domain is shown in wheat, the outer domain in raspberry. The mimetic peptides M48U1 and M48 are colored yellow. The root mean square deviation (RMSD) between complexes for main chain atoms is 0.8 Å.

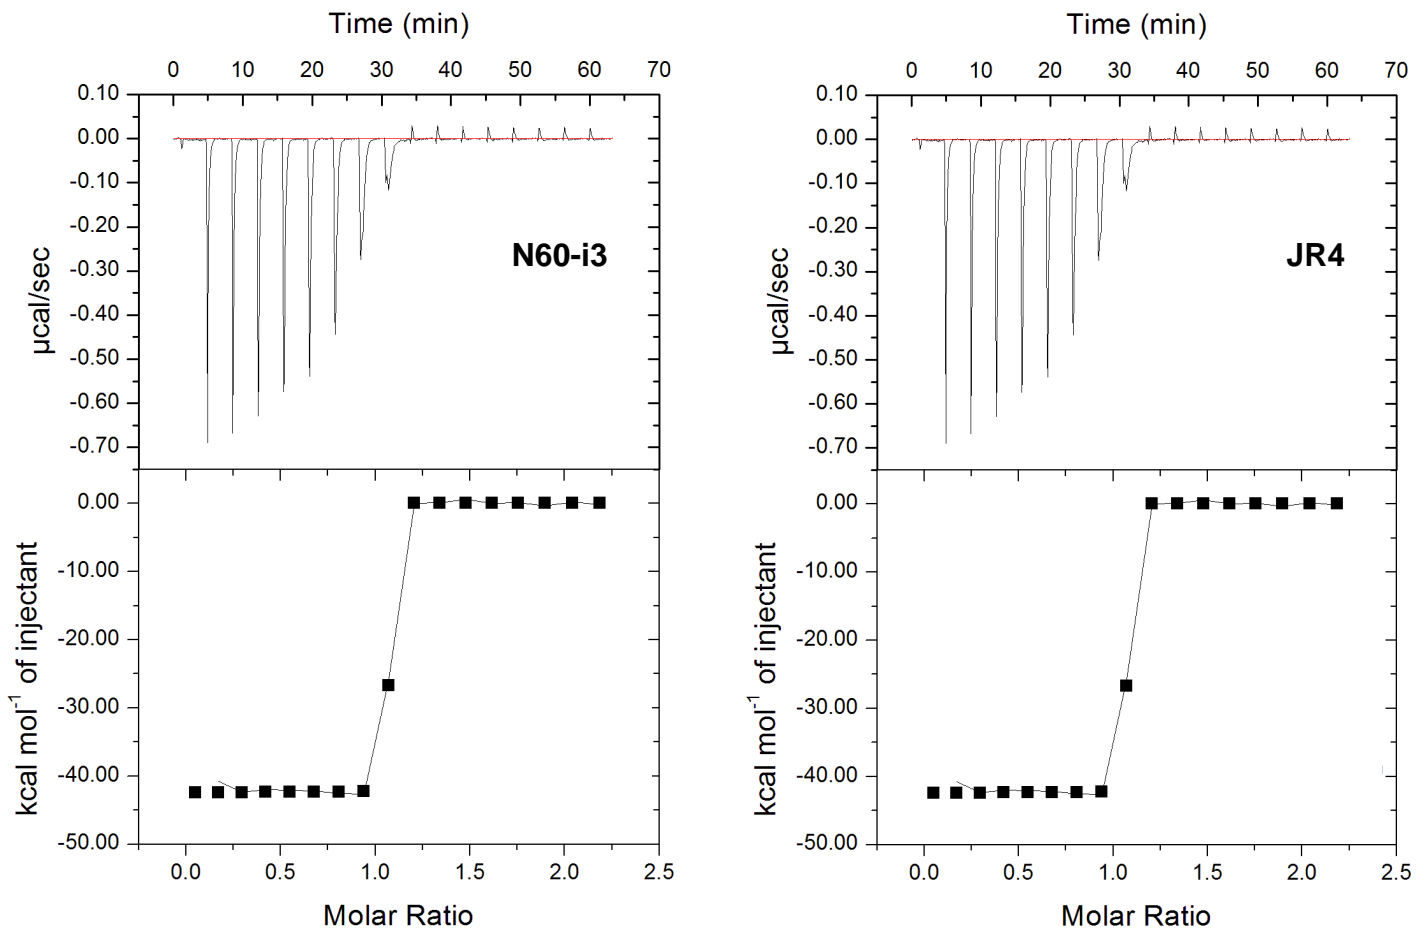

**Figure S3. mAb N60-i3 and mAb JR4 binding to a single-chain gp120<sub>BaL</sub>-CD4 complex (FLSC, (1)) as measured by ITC.** Isothermal titration calorimetry (ITC) was used to characterize the interaction of FLSC with N60-i3 and JR4 IgGs. All proteins were dialyzed against 1X PBS pH 7.4 and experiments performed using an iTC200 instrument (GE Healthcare). A typical experiment had JR4 or N60-i3 in the syringe (111  $\mu$ M) and FLSC in the cell (11  $\mu$ M). Titrations were performed at 25  $^{\circ}$ C with 17 injections of 2.42  $\mu$ l aliquots, with 210-240 second intervals between injections. Heats of dilutions were measured and subtracted from each data set. All data were analyzed using Origin 7.0 software. The results of the titration experiments, in which a fixed amount of FLSC was titrated against increasing concentration of N60-i3 or JR4 IgG, are shown. The ITC binding isotherm for both N60-i3 and JR4 against FLSC shows a “step” indicative of tight (<nM) binding, precluding an accurate determination of  $K_D$ , but allowing the determination of  $\Delta H$  of  $-4.253(\pm 0.23)$  and  $-2.19(\pm 0.25)$  kcal/mol for the N60-i3 and JR4-bound complexes, respectively.

```

Heavy chains      10          20          30          40          5052a      60
                  |          |          |          |          |          |
N60-i3 HSEVQLVESGPGPLVKPSQTLSLCTVSGASIS SGGYFWS WIRQHPGKGLEWIG NIYYIG-NTYYNPSLKS
          *+
JR4      .. . . . .LE. . . . .A.P.G..R RN--Y. . . . .P. . . . . HS.GS.GS.N. . . . .E.
          -----FWR1----- -CDRH1- -----FWR2----- -----CDRH2-----

                  70          8082abc      90          100abcdef      110
                  |          |          |          |          |
N60-i3 RLTISVDTTQNFSLKLTSVTAADTAVYYCAR VP--RLRGGNYFDS WGQGTLTVTVSS
                  + + + +
JR4      .V.L. . . .SK.L. . . . .. TVWYYTS.TH. . .H . . . .V. . . . .
          -----FWR3----- -CDRH3- -----FWR4-----

Light chains     10          20          27ab 30          40          50
                  |          |          |          |          |          |
N60-i3 QSVLTQPASVSGSPGQSITISC TGTSSDVGGYKYVS WYQQHPDKAPKLMIIY EVSNRPS
                  +
JR4      . . . . .P. . .AA. . .KV. . . . S.S. .NI. -RS. . . . .V.GA. . .L. .DTNK. . .
          -----FWR1----- -CDRL1- -----FWR2----- -CDRL2-----

                  60          70          80          90 95ab 100
                  |          |          |          |          |
N60-i3 GVSNRFSGSKSGNTASLTISGLQAEDEADYYC SSYTSS-STWV FGGGTKLTVL
                  +
JR4      . . .D. . . . .SS. . .A.T. .TG. . . . . GAWDG.LNVHI .S. . . . .
          -----FWR3----- -CDRL3- -----FWR4-----

```

**Figure S4. Residues in N60-i3 and JR4 involved the gp120 binding interface.** Identical JR4 residues are shown with a dot in the alignment and gaps with a dash. Buried residues are highlighted red (and underlined in JR4 when a dot is used). Main chain (o), side chain (+), and both main and side chain (\*) interactions are shown immediately above the residue as defined by a 5 Å distance criteria cutoff and colored based on contact type, hydrophobic (blue), hydrophilic (green), or both (black). Framework and complementary-determining regions are indicated below the alignment. Only the variable regions of the heavy and light chains for both antibodies are shown. The light chain contacts of N60-i3 Fab are largely confined to tyrosine residues; Tyr<sup>30</sup> (framework region L1 [FWR L1]), Tyr<sup>32</sup> (CDR L1), and Tyr<sup>91</sup> (CDR L3) contacting  $\alpha$ 0-helix (Layer 1) in the Thr<sup>71</sup>HisAlaCysValPro motif of gp120. JR4 involves Tyr<sup>32</sup> (CDR L1), Tyr<sup>49</sup> (FWR L1) and Asp<sup>50</sup>, Leu<sup>53</sup> and Ser<sup>56</sup> (CDR L2) to contact the  $\beta$ 1-strand and  $\beta$ 1- $\beta$ 0-connecting coil (Layer 1) in the Thr<sup>71</sup>HisAlaCysValPro and Asn<sup>80</sup>ProGln motifs of gp120 (Figure 5). In both complexes, the rest of the binding contacts to Layer 1 and all contacts with Layer 2 and the 7-stranded  $\beta$ -sheet are provided by the heavy chain of the Fab with CDR H3 contributing the most to the contact interface. In N60-i3, Arg<sup>97</sup> and Arg<sup>99</sup> (CDR H3) represent 41% of the heavy chain binding surface and make up the bulk of N60-i3's electrostatic contribution to the binding interface including Glu<sup>106</sup>Asp<sup>107</sup> in the  $\alpha$ 1-helix (Layer 2) of gp120. Hydrophobic contributions to the interface come from Phe<sup>35</sup> (CDR H1), Tyr<sup>52</sup>, Tyr<sup>53</sup>, Ile<sup>54</sup> (CDR H2), Leu<sup>98</sup> (CDR H3), Tyr<sup>30</sup>, Tyr<sup>32</sup> (CDR L1), and Tyr<sup>91</sup> (CDR L3). Main chain residues from Gly<sup>32</sup>, Ser<sup>31</sup>, Gly<sup>33</sup> (CDR H1), Leu<sup>98</sup>, Arg<sup>99</sup>, and Gly<sup>100</sup> (CDR H3) further stabilize the interface. Ile<sup>29</sup> and Ser<sup>30</sup> from FWR H1 contribute slightly to the interface, but the binding interface occurs primarily within the complementary-determining regions.



In JR4, Arg<sup>30</sup> (FWR H1), Arg<sup>31</sup> (CDR H1), and Arg<sup>94</sup> (FWR H3) provide the bulk of the electrostatic contribution to the interface including Glu<sup>106</sup>Asp<sup>107</sup> in the  $\alpha$ 1-helix (Layer 2) of gp120, but only makes up approximately 20% of the interface (25% of the total heavy chain contribution). JR4's contact with gp120 is more extensive than N60-i3 but with fewer main chain contributions to the interface, Glu<sup>1</sup> (FWR H1), Arg<sup>31</sup> (CDR H1), and Thr<sup>100</sup> (CDR H3) being the exceptions. Approximately 18% of the buried surface area of JR4 comes from outside of the traditional complementary-determining regions with contributions from largely adjacent residues from FWR H1, FWR H3, and FWR L2. The hydrophobic contribution of Tyr<sup>33</sup> (CDR H1), Tyr<sup>52</sup> (CDR H2), Tyr<sup>98</sup>, Tyr<sup>99</sup>, Tyr<sup>100E</sup> (CDR H3) Tyr<sup>32</sup> (CDR L1), and Tyr<sup>49</sup> (CDR L2) is coupled with residues Val<sup>2</sup> (FWR H1), Val<sup>96</sup>, Trp<sup>97</sup> (CDR H3) and Leu<sup>46</sup> (CDR L2) and represents a greater proportion of the total buried surface area implying that charge is not the major stabilizing factor in the JR4 binding interface. A full list of contacts can be found in supplemental Table S2.

1. **Fouts TR, Tuskan R, Godfrey K, Reitz M, Hone D, Lewis GK, DeVico AL.** 2000. Expression and characterization of a single-chain polypeptide analogue of the human immunodeficiency virus type 1 gp120-CD4 receptor complex. *J Virol* **74**:11427-11436.
